# Supplementary material
Source: PubMed Central journal article supplement (PMC4428345)

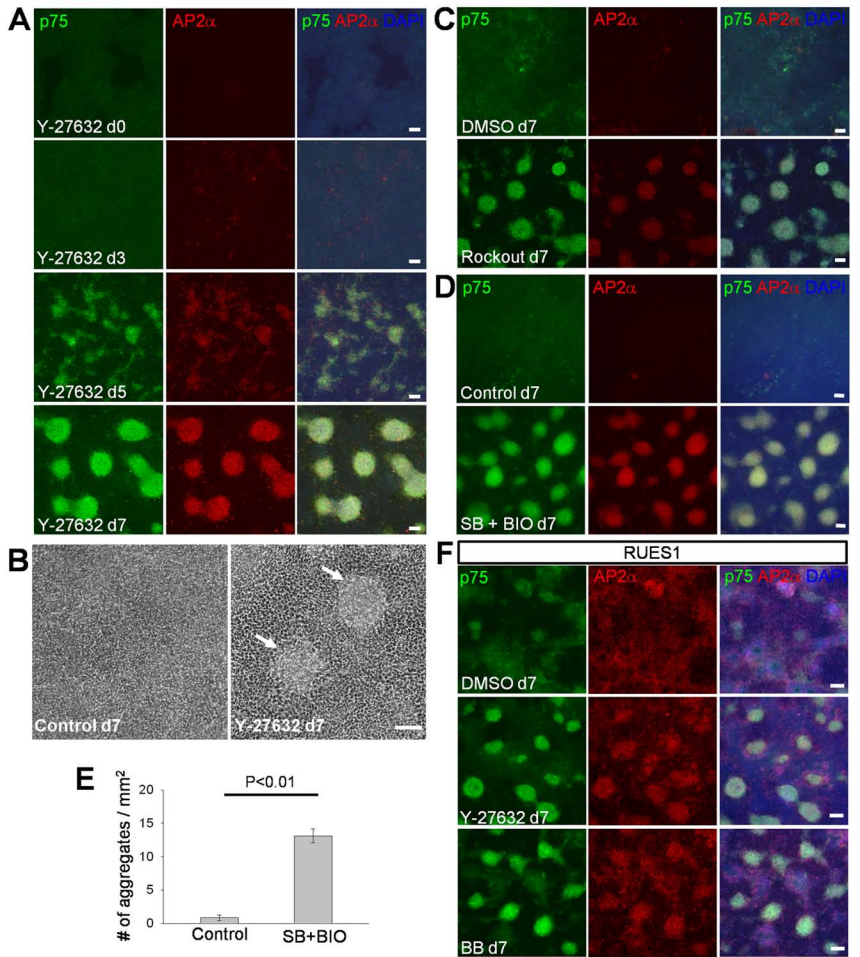

Endoderm  
Mesoderm

*Brachyury*

*MIXL1*

*FOXA2*

*SOX17*

*GSC*

*GAPDH*

-RT d0 d1 d2 d4 d7 d7

Y-27632

Control

Mesendoderm

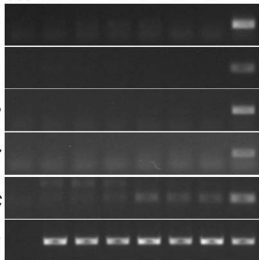

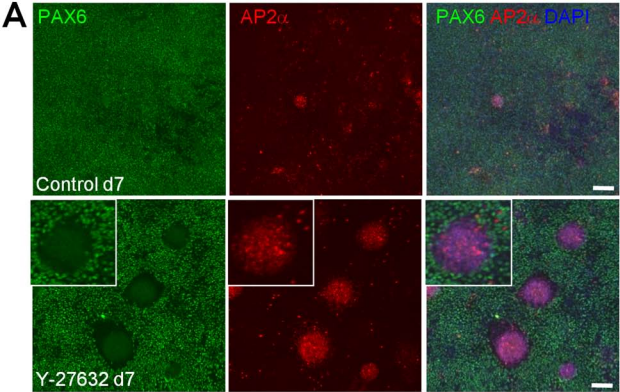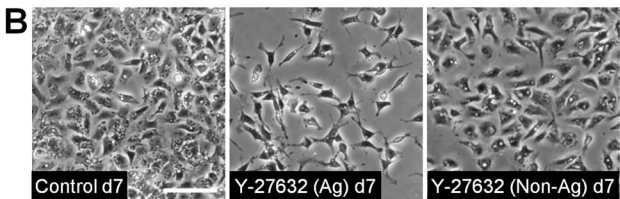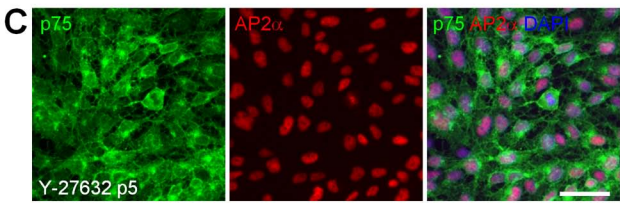

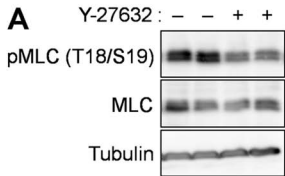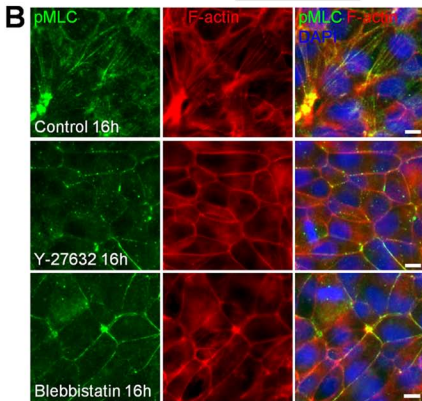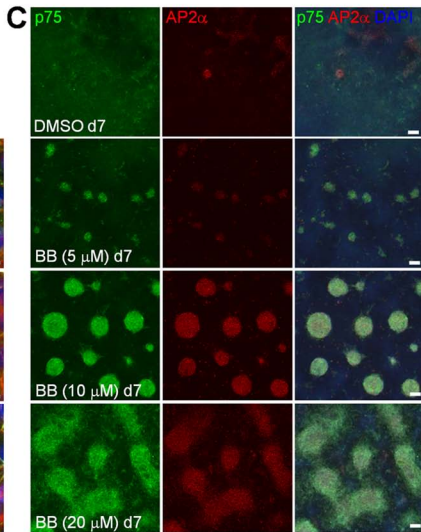

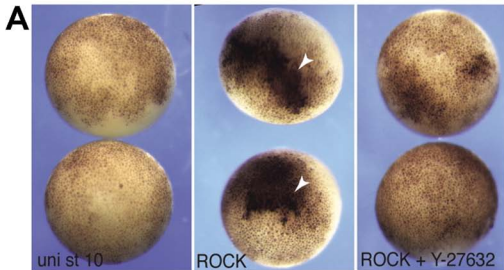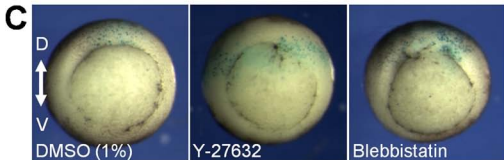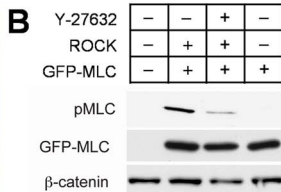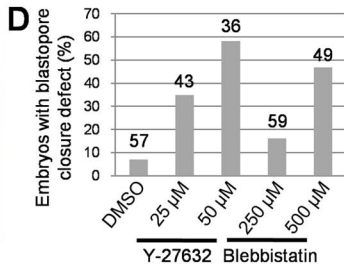

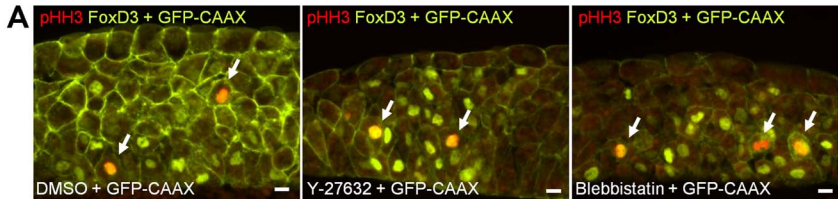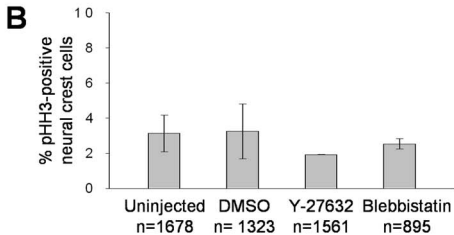

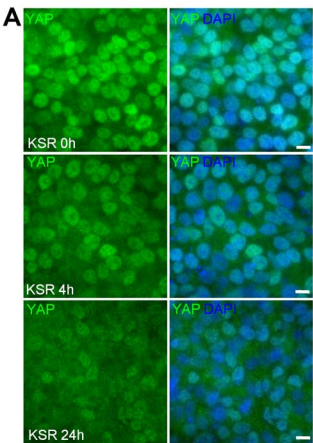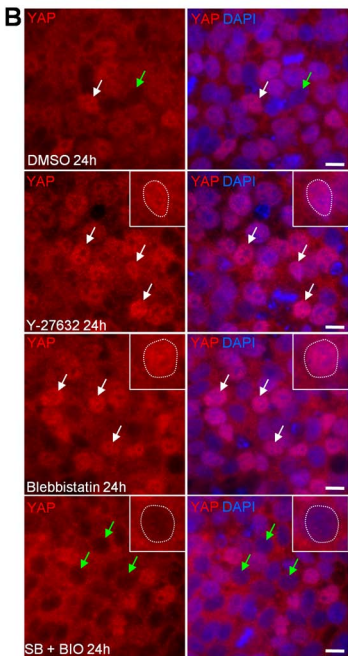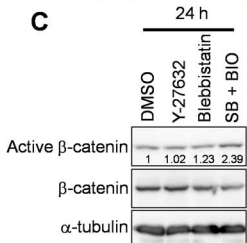

Supplement: NIHMS636187-supplement-Supp_FigureS1-S7.pdf [file NIHMS636187-supplement-Supp_FigureS1-S7.pdf]
